# Supplementary material
Source: Springer Nature journal article supplement (https://www.springermedizin.de/resource/supplementary/12885_2013_4648_MOESM2_ESM.pdf/9466972)

 Countries currently enrolling patients

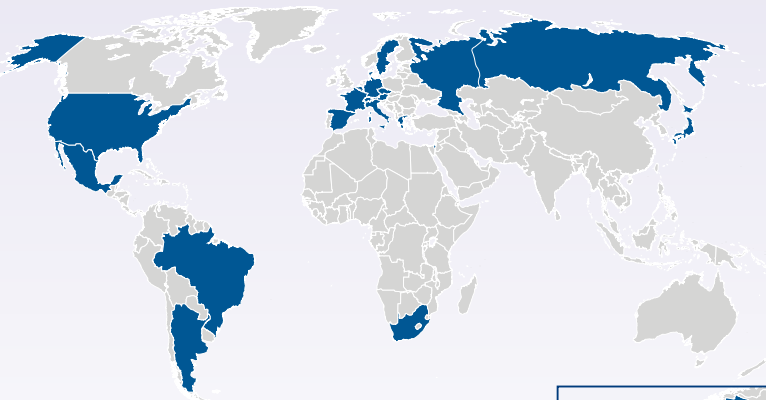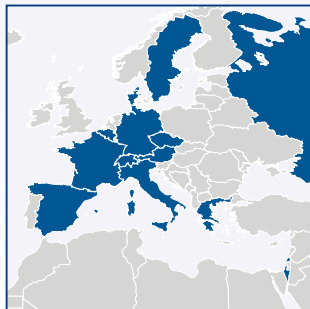

Supplement: MOESM2 [file 9466972]
